# Supplementary material for: Rural-Urban Disparities in Vaccine Hesitancy among Adults in South Tyrol, Italy
Source: MDPI journal article supplement (doi:10.3390/vaccines10111870), 2022-11-05
Supplement: s1 [file s1]

*Supplementary Material*

# Rurality and Vaccine Hesitancy in a Probability-Based Cross-Sectional Survey of South Tyrol, Italy

Verena Barbieri, Christian J. Wiedermann, Stefano Lombardo, Barbara Plagg, Timon Gärtner, Dietmar Ausserhofer, Wolfgang Wiedermann, Adolf Engl, and Giuliano Piccoliori

**Table S1.** Baseline characteristics for differences between urban and rural residents for the groups of hesitant and non-hesitant participants.

| Variable               | Urban / Rural             |                      |                   |                      | Non-hesitant / Hesitant |                      |                |                      |
|------------------------|---------------------------|----------------------|-------------------|----------------------|-------------------------|----------------------|----------------|----------------------|
|                        | Non-hesitant<br>N = 1,204 |                      | Hesitant<br>N=222 |                      | Urban<br>N=602          |                      | Rural<br>N=824 |                      |
|                        | N (%)                     | <i>p</i> -<br>Value* | N (%)             | <i>p</i> -<br>Value* | N (%)                   | <i>p</i> -<br>Value* | N (%)          | <i>p</i> -<br>Value* |
| <b>Age (years)</b>     |                           | n.s.                 |                   | 0.001                |                         | 0.005                |                | <0.001               |
| 18 – 34                | urban                     | 108 (20.6)           | 22 (28.9)         |                      | non-hesitant            | 108 (20.6)           | 140 (20.6)     |                      |
|                        | rural                     | 140 (20.6)           | 63 (43.8)         |                      | hesitant                | 22 (28.9)            | 63 (43.8)      |                      |
| 35 – 49                | urban                     | 118 (22.5)           | 20 (26.3)         |                      | non-hesitant            | 118 (22.5)           | 163 (24.0)     |                      |
|                        | rural                     | 163 (24.0)           | 53 (36.8)         |                      | hesitant                | 20 (26.3)            | 53 (36.8)      |                      |
| 50 – 64                | urban                     | 150 (28.6)           | 27 (35.5)         |                      | non-hesitant            | 150 (28.6)           | 192 (28.3)     |                      |
|                        | rural                     | 192 (28.3)           | 22 (15.3)         |                      | hesitant                | 27 (35.5)            | 22 (15.3)      |                      |
| ≥64                    | urban                     | 148 (28.2)           | 7 (9.2)           |                      | non-hesitant            | 148 (28.2)           | 184 (27.1)     |                      |
|                        | rural                     | 184 (27.1)           | 6 (4.2)           |                      | hesitant                | 7 (9.2)              | 6 (4.2)        |                      |
| <b>Gender</b>          |                           | n.s.                 |                   | n.s.                 |                         | n.s.                 |                | n.s.                 |
| Female                 | urban                     | 272 (51.8)           | 36 (46.8)         |                      | non-hesitant            | 272 (51.8)           | 345 (50.8)     |                      |
|                        | rural                     | 345 (50.8)           | 82 (56.6)         |                      | hesitant                | 36 (46.8)            | 82 (56.6)      |                      |
| Male                   | urban                     | 253 (48.2)           | 41 (53.2)         |                      | non-hesitant            | 253 (48.2)           | 334 (49.2)     |                      |
|                        | rural                     | 334 (49.2)           | 63 (43.4)         |                      | hesitant                | 41 (53.2)            | 63 (43.4)      |                      |
| <b>Education</b>       |                           | <0.001               |                   | 0.03                 |                         | n.s.                 |                | 0.004                |
| Middle school or lower | urban                     | 117 (22.3)           | 16 (21.1)         |                      | non-hesitant            | 117 (22.3)           | 161 (23.7)     |                      |
|                        | rural                     | 161 (23.7)           | 22 (15.3)         |                      | hesitant                | 16 (21.1)            | 22 (15.3)      |                      |
| Vocational school      | urban                     | 103 (19.7)           | 20 (26.3)         |                      | non-hesitant            | 103 (19.7)           | 232 (34.1)     |                      |
|                        | rural                     | 232 (34.1)           | 55 (38.2)         |                      | hesitant                | 20 (26.3)            | 55 (38.2)      |                      |
| High school            | urban                     | 153 (29.2)           | 24 (31.6)         |                      | non-hesitant            | 153 (29.2)           | 180 (26.5)     |                      |
|                        | rural                     | 180 (26.5)           | 54 (37.5)         |                      | hesitant                | 24 (31.6)            | 54 (37.5)      |                      |
| University             | urban                     | 151 (28.8)           | 16 (21.1)         |                      | non-hesitant            | 151 (28.8)           | 107 (15.7)     |                      |
|                        | rural                     | 107 (15.7)           | 13 (9.0)          |                      | hesitant                | 16 (21.1)            | 13 (9.0)       |                      |
| <b>Citizenship</b>     |                           | n.s.                 |                   | n.s.                 |                         | n.s.                 |                | n.s.                 |
| Italian                | urban                     | 477 (90.9)           | 67 (88.2)         |                      | non-hesitant            | 477 (90.9)           | 631 (92.9)     |                      |
|                        | rural                     | 631 (92.9)           | 132 (91.7)        |                      | hesitant                | 67 (88.2)            | 132 (91.7)     |                      |

|                                                                     |       |             |        |            |        |              |            |       |            |        |
|---------------------------------------------------------------------|-------|-------------|--------|------------|--------|--------------|------------|-------|------------|--------|
| Other                                                               | urban | 48 (9.1)    |        | 9 (11.8)   |        | non-hesitant | 48 (9.1)   |       | 48 (7.1)   |        |
|                                                                     | rural | 48 (7.1)    |        | 12 (8.3)   |        | hesitant     | 9 (11.8)   |       | 12 (8.3)   |        |
| <b>Native Language<sup>1</sup></b>                                  |       |             | <0.001 |            | <0.001 |              |            | n.s.  |            | n.s.   |
| German                                                              | urban | 193 (36.8)  |        | 27 (35.1)  |        | non-hesitant | 193 (53.1) |       | 547 (80.7) |        |
|                                                                     | rural | 547 (80.7)  |        | 112 (77.2) |        | hesitant     | 27 (45.5)  |       | 112 (77.2) |        |
| Italian                                                             | urban | 278 (53.1)  |        | 35 (45.5)  |        | non-hesitant | 278 (36.8) |       | 60 (8.8)   |        |
|                                                                     | rural | 60 (8.8)    |        | 10 (6.9)   |        | hesitant     | 35 (35.1)  |       | 10 (6.9)   |        |
| Ladin                                                               | urban | 6 (1.1)     |        | 1 (1.3)    |        | non-hesitant | 6 (1.1)    |       | 41 (6.0)   |        |
|                                                                     | rural | 41 (6.0)    |        | 9 (6.29)   |        | hesitant     | 1 (1.3)    |       | 9 (6.9)    |        |
| More than one/another language                                      | urban | 47 (9.0)    |        | 14 (18.2)  |        | non-hesitant | 47 (9.0)   |       | 30 (4.4)   |        |
|                                                                     | rural | 30 (4.4)    |        | 14 (9.7)   |        | hesitant     | 14 (18.2)  |       | 14 (9.7)   |        |
| <b>Household / Family structure (more than one answer possible)</b> |       |             |        |            |        |              |            |       |            |        |
| Single                                                              | urban | 85 (16.2)   | n.s.   | 14 (18.2)  | n.s.   | non-hesitant | 85 (16.2)  | n.s.  | 121 (17.8) | 0.046  |
|                                                                     | rural | 121 (17.8)  |        | 16 (11.0)  |        | hesitant     | 14 (18.2)  |       | 16 (11.0)  |        |
| Children 0–6 years of age                                           | urban | 53 (10.1)   | n.s.   | 9 (11.7)   | n.s.   | non-hesitant | 53 (10.1)  | n.s.  | 84 (12.4)  | 0.002  |
|                                                                     | rural | 84 (12.4)   |        | 32 (22.1)  |        | hesitant     | 9 (11.7)   |       | 32 (22.1)  |        |
| Adolescents 7–17 years of age                                       | urban | 88 (16.8)   | n.s.   | 15 (19.5)  | n.s.   | non-hesitant | 88 (16.8)  | n.s.  | 135 (19.9) | n.s.   |
|                                                                     | rural | 135 (19.9)  |        | 39 (26.9)  |        | hesitant     | 15 (19.5)  |       | 39 (26.9)  |        |
| COVID-19 patients at risk <sup>2</sup>                              | urban | 120 (22.9)  | n.s.   | 7 (9.1)    | n.s.   | non-hesitant | 120 (22.9) | 0.006 | 155 (22.8) | 0.016  |
|                                                                     | rural | 155 (22.8)  |        | 20 (13.8)  |        | hesitant     | 7 (9.1)    |       | 20 (13.8)  |        |
| None of the above                                                   | urban | 195 (37.1)  | n.s.   | 34 (44.2)  | n.s.   | non-hesitant | 195 (37.1) | n.s.  | 238 (35.1) | n.s.   |
|                                                                     | rural | 238 (35.1)  |        | 56 (38.9)  |        | hesitant     | 34 (44.2)  |       | 56 (38.9)  |        |
| <b>Working in the health sector</b>                                 |       |             | n.s.   |            | n.s.   |              |            | 0.046 |            | n.s.   |
| Yes                                                                 | urban | 39 (7.4)    |        | 1 (1.3)    |        | non-hesitant | 39 (7.4)   |       | 37 (5.5)   |        |
|                                                                     | rural | 37 (5.5)    |        | 7 (4.8)    |        | hesitant     | 1 (1.3)    |       | 7 (4.8)    |        |
| No                                                                  | urban | 486 (92.6)  |        | 75 (98.7)  |        | non-hesitant | 486 (92.6) |       | 641 (94.5) |        |
|                                                                     | rural | 641 (94.5)  |        | 138 (95.2) |        | hesitant     | 75 (98.7)  |       | 138 (95.2) |        |
| <b>Chronic disease(s)</b>                                           |       |             | n.s.   |            | 0.034  |              |            | 0.023 |            | <0.001 |
| Yes                                                                 | urban | 114 (21.8)  |        | 8 (10.5)   |        | non-hesitant | 114 (21.8) |       | 119 (17.5) |        |
|                                                                     | rural | 119 (17.59) |        | 5 (3.4)    |        | hesitant     | 8 (10.5)   |       | 5 (3.4)    |        |
| No                                                                  | urban | 410 (78.2)  |        | 68 (89.5)  |        | non-hesitant | 410 (78.2) |       | 560 (82.5) |        |
|                                                                     | rural | 560 (82.5)  |        | 140 (96.6) |        | hesitant     | 68 (89.5)  |       | 140 (96.6) |        |

| Relatives or friends died from COVID-19 |       |            | n.s. | n.s.       |              | n.s.       | n.s.       |
|-----------------------------------------|-------|------------|------|------------|--------------|------------|------------|
| Yes                                     | urban | 57 (10.9)  |      | 6 (7.8)    | non-hesitant | 57 (10.9)  | 53 (7.8)   |
|                                         | rural | 53 (7.8)   |      | 8 (5.5)    | hesitant     | 6 (7.8)    | 8 (5.5)    |
| No                                      | urban | 467 (89.1) |      | 71 (92.2)  | non-hesitant | 467 (89.1) | 626 (92.2) |
|                                         | rural | 626 (92.2) |      | 137 (94.5) | hesitant     | 71 (92.2)  | 137 (94.5) |
| Economic situation (last 3 months)      |       |            | 0.02 | n.s.       |              | 0.013*     | <0.001     |
| Better                                  | urban | 23 (4.4)   |      | 0 (0.0)    | non-hesitant | 23 (4.4)   | 20 (2.9)   |
|                                         | rural | 20 (2.9)   |      | 0 (0.0)    | hesitant     | 0 (0.0)    | 0 (0.0)    |
| The same                                | urban | 385 (73.5) |      | 48 (63.2)  | non-hesitant | 385 (73.5) | 465 (68.5) |
|                                         | rural | 465 (68.5) |      | 74 (51.4)  | hesitant     | 48 (63.2)  | 74 (51.4)  |
| Worse                                   | urban | 103 (19.7) |      | 26 (34.2)  | non-hesitant | 103 (19.7) | 182 (26.8) |
|                                         | rural | 182 (26.8) |      | 63 (43.8)  | hesitant     | 26 (34.2)  | 63 (43.8)  |
| Don't know                              | urban | 13 (2.5)   |      | 2 (2.6)    | non-hesitant | 13 (2.5)   | 12 (1.8)   |
|                                         | rural | 12 (1.8)   |      | 7 (4.9)    | hesitant     | 2 (2.6)    | 7 (4.9)    |

# Per variable, all urban and all rural percentages, respectively, result in sum of 100%.

† per variable, all hesitant and all non-hesitant percentages, respectively, result in sum of 100%.

\* Chi squared test.

**Table S2.** Attributes of the sample towards compulsory vaccination for non-coronaviruses and comparisons between urban and rural residents.

| Variable                                                                                                                            | Residency   | (Rather) No<br>[1-2]<br>N (%) | [3-4]<br>N (%) | (Rather) Yes<br>[5-6]<br>N (%) | <i>p</i> -Value<br>Chi-square test |
|-------------------------------------------------------------------------------------------------------------------------------------|-------------|-------------------------------|----------------|--------------------------------|------------------------------------|
| <b>Do you agree with the decisions taken by the authorities to increase the coverage of compulsory vaccinations?</b> <sup>1</sup>   | Total N=178 | 221 (15.5)                    | 281 (19.7)     | 799 (56.1)                     | n.s.                               |
|                                                                                                                                     | Urban N=62  | 84 (14.0)                     | 118 (19.6)     | 348 (57.9)                     |                                    |
|                                                                                                                                     | Rural N=116 | 137 (16.6)                    | 163 (19.8)     | 451 (54.7)                     |                                    |
| <b>How seriously do you think the consequences for your child's health would be if he/she did not have compulsory vaccinations?</b> | Total       | 47 (26.4)                     | 70 (39.3)      | 61 (34.3)                      | 0.033                              |
|                                                                                                                                     | Urban       | 12 (19.4)                     | 21 (33.9)      | 29 (46.8)                      |                                    |
|                                                                                                                                     | Rural       | 35 (30.2)                     | 49 (42.2)      | 32 (27.6)                      |                                    |
| <b>Compulsory vaccinations are not necessary because</b><br><br>efficacy is not given                                               | Total       | 124 (69.7)                    | 37 (20.8)      | 17 (9.6)                       | n.s.                               |
|                                                                                                                                     | Urban       | 46 (74.2)                     | 14 (22.6)      | 2 (3.2)                        |                                    |
|                                                                                                                                     | Rural       | 78 (67.2)                     | 23 (19.8)      | 15 (12.9)                      |                                    |
| the natural immune system is completely sufficient                                                                                  | Total       | 117 (65.4)                    | 44 (24.6)      | 18 (10.1)                      | n.s.                               |
|                                                                                                                                     | Urban       | 43 (68.3)                     | 16 (25.4)      | 4 (6.3)                        |                                    |
|                                                                                                                                     | Rural       | 74 (63.8)                     | 28 (24.1)      | 14 (12.1)                      |                                    |
| those diseases no longer exist                                                                                                      | Total       | 139 (78.1)                    | 32 (18.0)      | 7 (3.9)                        | n.s.                               |
|                                                                                                                                     | Urban       | 49 (79.0)                     | 10 (16.1)      | 3 (4.8)                        |                                    |
|                                                                                                                                     | Rural       | 90 (77.6)                     | 22 (19.0)      | 4 (3.4)                        |                                    |
| The whole thing is just a profit for the pharmaceutical industry                                                                    | Total       | 126 (70.4)                    | 29 (16.2)      | 24 (13.4)                      | n.s.                               |
|                                                                                                                                     | Urban       | 49 (77.8)                     | 9 (14.3)       | 5 (7.9)                        |                                    |
|                                                                                                                                     | Rural       | 77 (66.4)                     | 20 (17.2)      | 19 (16.4)                      |                                    |
| <b>Compulsory vaccinations harm, because</b><br><br>the risks are greater than the protection                                       | Total       | 131 (73.6)                    | 31 (17.4)      | 16 (9.0)                       | n.s.                               |
|                                                                                                                                     | Urban       | 50 (79.4)                     | 10 (15.9)      | 3 (4.8)                        |                                    |
|                                                                                                                                     | Rural       | 81 (70.4)                     | 21 (18.3)      | 13 (11.3)                      |                                    |
| vaccines are not sufficiently controlled                                                                                            | Total       | 125 (69.8)                    | 35 (19.6)      | 19 (10.6)                      | n.s.                               |
|                                                                                                                                     | Urban       | 49 (77.8)                     | 11 (17.5)      | 3 (4.8)                        |                                    |
|                                                                                                                                     | Rural       | 76 (65.5)                     | 24 (20.7)      | 16 (13.8)                      |                                    |
| Some doctors advise against it                                                                                                      | Total       | 126 (70.4)                    | 40 (22.3)      | 13 (7.3)                       | n.s.                               |
|                                                                                                                                     | Urban       | 45 (71.4)                     | 14 (22.2)      | 4 (6.3)                        |                                    |
|                                                                                                                                     | Rural       | 81 (69.8)                     | 26 (22.4)      | 9 (7.8)                        |                                    |

|                                                                                                    |               |            |            |            |      |
|----------------------------------------------------------------------------------------------------|---------------|------------|------------|------------|------|
| there have been negative vaccination experiences in my family                                      | Total         | 146 (82)   | 22 (12.4)  | 10 (5.6)   | n.s. |
|                                                                                                    | Urban         | 52 (83.9)  | 8 (12.9)   | 2 (3.2)    |      |
|                                                                                                    | Rural         | 94 (81)    | 14 (12.1)  | 8 (6.9)    |      |
| <b>In the current debate on COVID19, how do you assess the position of compulsory vaccination?</b> |               |            |            |            |      |
| My children must receive the protection they need                                                  | Total         | 18 (10.1)  | 32 (18)    | 128 (71.9) | n.s. |
|                                                                                                    | Urban         | 4 (6.3)    | 8 (12.7)   | 51 (81)    |      |
|                                                                                                    | Rural         | 14 (12.2)  | 24 (20.9)  | 77 (67)    |      |
| Herd immunity must be guaranteed                                                                   | Total         | 16 (8.9)   | 57 (31.8)  | 106 (59.2) | n.s. |
|                                                                                                    | Urban         | 6 (9.5)    | 15 (23.8)  | 42 (66.7)  |      |
|                                                                                                    | Rural         | 10 (8.6)   | 42 (36.2)  | 64 (55.2)  |      |
| At the moment, access to compulsory vaccination is difficult                                       | Total         | 68 (38.2)  | 77 (43.3)  | 33 (18.5)  | n.s. |
|                                                                                                    | Urban         | 27 (43.5)  | 22 (35.5)  | 13 (21)    |      |
|                                                                                                    | Rural         | 41 (35.3)  | 55 (47.4)  | 20 (17.2)  |      |
| I am concerned about the decline in compulsory vaccination due to the COVID19 pandemic             | Total         | 56 (31.5)  | 75 (42.1)  | 47 (26.4)  | n.s. |
|                                                                                                    | Urban         | 18 (29.0)  | 28 (45.2)  | 16 (25.8)  |      |
|                                                                                                    | Rural         | 38 (32.8)  | 47 (40.5)  | 31 (26.7)  |      |
| If it were possible to vaccinate your child at your doctor's office, that would be more reassuring | Total         | 44 (24.7)  | 61 (34.3)  | 73 (41)    | n.s. |
|                                                                                                    | Urban         | 11 (17.7)  | 23 (37.1)  | 28 (45.2)  |      |
|                                                                                                    | Rural         | 33 (28.4)  | 38 (32.8)  | 45 (38.8)  |      |
| In the current pandemic situation, compulsory vaccinations can wait                                | Total         | 106 (59.2) | 47 (26.3)  | 26 (14.5)  | n.s. |
|                                                                                                    | Urban         | 39 (61.9)  | 15 (23.8)  | 9 (14.3)   |      |
|                                                                                                    | Rural         | 67 (57.8)  | 32 (27.6)  | 17 (14.7)  |      |
| <b>Would your child receive compulsory vaccinations? If so, why? <sup>2</sup></b>                  |               |            |            |            |      |
| I want to protect my child                                                                         |               | yes        | empty      |            |      |
|                                                                                                    | Total (N=157) | 131 (84)   | 26 (16)    |            |      |
|                                                                                                    | Urban (N=58)  | 51 (88)    | 7 (12)     |            |      |
|                                                                                                    | Rural (N=99)  | 81 (82)    | 18 (18)    |            |      |
| It is my responsibility as a parent                                                                | Total         | 106 (67)   | 51 (33)    |            |      |
|                                                                                                    | Urban         | 38 (66)    | 20 (34)    |            |      |
|                                                                                                    | Rural         | 68 (69)    | 31 (31)    |            |      |
| Otherwise, I would receive a sanction                                                              | Total         | 11 (7.1)   | 146 (92.9) |            |      |
|                                                                                                    | Urban         | 4 (6.5)    | 54 (93.5)  |            |      |
|                                                                                                    | Rural         | 8 (8)      | 92 (92)    |            |      |

|                                                                                           |              |         |            |
|-------------------------------------------------------------------------------------------|--------------|---------|------------|
| My friends and family expect me to do it                                                  | Total        | 4 (2.2) | 154 (97.8) |
|                                                                                           | Urban        | 2 (3.5) | 56 (96.5)  |
|                                                                                           | Rural        | 2 (2)   | 97 (98)    |
| <b>Would you require your child to have compulsory vaccinations? If not, why?</b>         |              |         |            |
| Vaccination involves expenses (loss of income, transport, parking, holidays, ...)         | Total (N=21) | 1 (5)   | 20 (95)    |
|                                                                                           | Urban (N=4)  | 1 (25)  | 3 (75)     |
|                                                                                           | Rural (N=17) | 0 (0)   | 17 (100)   |
| I don't know where to do it                                                               | Total        | 1 (5)   | 20 (95)    |
|                                                                                           | Urban        | 0 (0)   | 4 (100)    |
|                                                                                           | Rural        | 1 (6)   | 16 (94)    |
| Others might accuse me of exposing my child to unknown dangers                            | Total        | 0 (0)   | 21 (100)   |
|                                                                                           | Urban        | 0 (0)   | 4 (100)    |
|                                                                                           | Rural        | 0 (0)   | 17 (100)   |
| I don't trust the authorities with my data                                                | Total        | 1 (5)   | 20 (95)    |
|                                                                                           | Urban        | 0 (0)   | 4 (100)    |
|                                                                                           | Rural        | 1 (6)   | 16 (94)    |
| I don't believe in the existence of those childhood diseases                              | Total        | 1 (5)   | 20 (95)    |
|                                                                                           | Urban        | 0 (0)   | 4 (100)    |
|                                                                                           | Rural        | 1 (6)   | 16 (94)    |
| I don't believe in the effectiveness of vaccination                                       | Total        | 9 (43)  | 12 (57)    |
|                                                                                           | Urban        | 1 (25)  | 3 (75)     |
|                                                                                           | Rural        | 8 (48)  | 9 (52)     |
| I am afraid that my child will be infected by vaccination or that side effects will occur | Total        | 16 (75) | 5 (25)     |
|                                                                                           | Urban        | 3 (75)  | 1 (25)     |
|                                                                                           | Rural        | 12 (72) | 5 (28)     |
| I believe that vaccination is painful                                                     | Total        | 1 (5)   | 20 (95)    |
|                                                                                           | Urban        | 1 (25)  | 3 (75)     |
|                                                                                           | Rural        | 0 (0)   | 100 (0)    |

<sup>1</sup> The option "I don't know" was available and contains the missing percentages.

<sup>2</sup> One could answer the questions with yes or leave them blank. There was no "no", because multiple answers were possible.  
Abbreviation: n.s., not significant.

**Table S3.** Attributes of the sample toward COVID-19 vaccination and comparisons between urban and rural residents.

| Variable                                                                                                             | Residency | (Rather) Not<br>agree/serious/no<br>[1 – 2] N (%) | [3 – 4] N (%)                 | (Rather)<br>Agree/serious/no<br>[5 – 6] N (%) | <i>p</i> -Value<br>urban vs. rural <sup>1</sup> |
|----------------------------------------------------------------------------------------------------------------------|-----------|---------------------------------------------------|-------------------------------|-----------------------------------------------|-------------------------------------------------|
| Apart from COVID-19, I think everyone should be vaccinated according to the national vaccine plan                    | Total     | 209 (14.7)                                        | 315 (22.1)                    | 901 (63.2)                                    | <0.001                                          |
|                                                                                                                      | Urban     | 70 (11.6)                                         | 112 (18.6)                    | 419 (69.7)                                    |                                                 |
|                                                                                                                      | Rural     | 139 (16.9)                                        | 203 (24.6)                    | 482 (58.5)                                    |                                                 |
| How seriously do you think the consequences for your daily life would be if you did not get vaccinated for COVID-19? | Total     | 404 (28.3)                                        | 506 (35.5)                    | 516 (36.2)                                    | 0.001                                           |
|                                                                                                                      | Urban     | 143 (23.8)                                        | 215 (35.7)                    | 244 (40.5)                                    |                                                 |
|                                                                                                                      | Rural     | 261 (31.7)                                        | 291 (35.3)                    | 272 (33)                                      |                                                 |
| Has the COVID-19 pandemic changed your attitude towards compulsory vaccinations?                                     |           | No                                                | Yes, I support it<br>more now | Yes, I support it<br>less now                 | n.s.                                            |
|                                                                                                                      | Total     | 1052 (73.8)                                       | 279 (19.6)                    | 94 (6.6)                                      |                                                 |
|                                                                                                                      | Urban     | 601 (74.5)                                        | 118 (19.6)                    | 35 (5.8)                                      |                                                 |
|                                                                                                                      | Rural     | 604 (73.3)                                        | 161 (19.5)                    | 59 (7.2)                                      |                                                 |
| What is your position on the anti-COVID-19 vaccine?                                                                  |           |                                                   |                               |                                               |                                                 |
| I believe the vaccine can help contain the spread of COVID-19                                                        |           | (Rather) Not<br>agree/serious/no<br>[1 – 2] N (%) | [3 – 4] N (%)                 | (Rather)<br>Agree/serious/no<br>[5 – 6] N (%) | n.s                                             |
|                                                                                                                      | Total     | 116 (8.1)                                         | 188 (13.2)                    | 1122 (78.7)                                   |                                                 |
|                                                                                                                      | Urban     | 44 (7.3)                                          | 73 (12.1)                     | 485 (80.6)                                    |                                                 |
|                                                                                                                      | Rural     | 72 (8.7)                                          | 115 (14.0)                    | 637 (77.3)                                    |                                                 |
| If I knew I was already infected with COVID-19, I would not get the vaccine                                          | Total     | 768 (53.9)                                        | 273 (19.2)                    | 383 (26.9)                                    | 0.007                                           |
|                                                                                                                      | Urban     | 353 (58.7)                                        | 106 (17.6)                    | 142 (23.6)                                    |                                                 |
|                                                                                                                      | Rural     | 415 (50.4)                                        | 167 (20.3)                    | 241 (29.3)                                    |                                                 |
| If everyone else is vaccinated against COVID-19, then I should not get vaccinated                                    | Total     | 1091 (76.5)                                       | 188 (13.2)                    | 147 (10.3)                                    | n.s.                                            |
|                                                                                                                      | Urban     | 477 (79.2)                                        | 69 (11.5)                     | 56 (9.3)                                      |                                                 |
|                                                                                                                      | Rural     | 614 (74.5)                                        | 119 (14.4)                    | 91 (11)                                       |                                                 |
| If the vaccine was recommended for me, I would do it                                                                 | Total     | 171 (12)                                          | 160 (11.2)                    | 1093 (76.8)                                   | n.s.                                            |
|                                                                                                                      | Urban     | 61 (10.1)                                         | 65 (10.8)                     | 475 (79.0)                                    |                                                 |
|                                                                                                                      | Rural     | 110 (13.4)                                        | 95 (11.5)                     | 618 (75.1)                                    |                                                 |
| If your doctor recommended a COVID-19 vaccination, how likely would you be to get vaccinated?                        | Total     | 183 (12.9)                                        | 170 (11.9)                    | 1071 (75.2)                                   | n.s.                                            |
|                                                                                                                      | Urban     | 70 (11.6)                                         | 66 (11.0)                     | 465 (77.4)                                    |                                                 |
|                                                                                                                      | Rural     | 113 (13.7)                                        | 104 (12.6)                    | 606 (73.6)                                    |                                                 |



| Which of the following statements on COVID19 vaccination do you agree with?                                                                                                                                                           |                 |             |            |            |        |
|---------------------------------------------------------------------------------------------------------------------------------------------------------------------------------------------------------------------------------------|-----------------|-------------|------------|------------|--------|
| COVID-19 vaccination is not necessary because                                                                                                                                                                                         |                 |             |            |            |        |
| it is not effective<br><br>natural herd immunity to virus spread is achieved and is completely sufficient<br><br>this disease does not exist/is a trivial flu<br><br>the whole thing is just a profit for the pharmaceutical industry | Total           | 1036 (72.7) | 270 (18.9) | 120 (8.4)  | n.s.   |
|                                                                                                                                                                                                                                       | Urban           | 453 (75.4)  | 97 (16.1)  | 51 (8.5)   |        |
|                                                                                                                                                                                                                                       | Rural           | 583 (70.7)  | 173 (21.0) | 69 (8.4)   |        |
|                                                                                                                                                                                                                                       | Total           | 944 (66.2)  | 312 (21.9) | 170 (11.9) | <0.001 |
|                                                                                                                                                                                                                                       | Urban           | 431 (71.6)  | 103 (17.1) | 68 (11.3)  |        |
|                                                                                                                                                                                                                                       | Rural           | 513 (62.3)  | 209 (25.4) | 102 (12.4) |        |
|                                                                                                                                                                                                                                       | Total           | 1150 (80.7) | 192 (13.5) | 83 (5.)    | 0.003  |
|                                                                                                                                                                                                                                       | Urban           | 509 (84.7)  | 61 (10.1)  | 31 (5.2)   |        |
|                                                                                                                                                                                                                                       | Rural           | 641 (77.8)  | 131 (15.9) | 52 (6.3)   |        |
|                                                                                                                                                                                                                                       | Total           | 917 (64.4)  | 323 (22.7) | 184 (12.9) | 0.003  |
|                                                                                                                                                                                                                                       | Urban           | 408 (67.9)  | 136 (22.6) | 57 (9.5)   |        |
|                                                                                                                                                                                                                                       | Rural           | 509 (61.8)  | 187 (22.7) | 127 (15.4) |        |
| Which of the following statements on COVID19 vaccination do you agree with?                                                                                                                                                           |                 |             |            |            |        |
| COVID-19 vaccination is harmful because                                                                                                                                                                                               |                 |             |            |            |        |
| long-term risks are unknown<br><br>new vaccines carry additional risks in the RNA<br><br>Some doctors advise against it<br><br>an obligation to vaccinate certain groups with priority will lead to great socio-political discussions | Total           | 472 (33.1)  | 487 (34.2) | 466 (32.7) | n.s.   |
|                                                                                                                                                                                                                                       | Urban           | 209 (34.8)  | 204 (33.9) | 188 (31.3) |        |
|                                                                                                                                                                                                                                       | Rural           | 263 (31.9)  | 283 (34.3) | 278 (33.7) |        |
|                                                                                                                                                                                                                                       | Total           | 737 (51.7)  | 529 (37.1) | 159 (11.2) | 0.006  |
|                                                                                                                                                                                                                                       | Urban           | 336 (55.9)  | 213 (35.4) | 52 (8.7)   |        |
|                                                                                                                                                                                                                                       | Rural           | 401 (48.7)  | 316 (38.3) | 107 (13)   |        |
|                                                                                                                                                                                                                                       | Total           | 866 (60.8)  | 384 (26.9) | 175 (12.3) | 0.037  |
|                                                                                                                                                                                                                                       | Urban           | 385 (64.1)  | 141 (23.5) | 75 (12.5)  |        |
|                                                                                                                                                                                                                                       | Rural           | 481 (58.4)  | 243 (29.5) | 100 (12.1) |        |
|                                                                                                                                                                                                                                       | Total           | 590 (41.4)  | 511 (35.9) | 324 (22.7) | 0.002  |
|                                                                                                                                                                                                                                       | Urban           | 266 (44.3)  | 184 (30.6) | 151 (25.1) |        |
|                                                                                                                                                                                                                                       | Rural           | 324 (39.3)  | 327 (39.7) | 173 (21.0) |        |
| Would you vaccinate for COVID19?                                                                                                                                                                                                      |                 |             |            |            |        |
| If so, why? <sup>2</sup>                                                                                                                                                                                                              |                 | yes         | empty      |            |        |
| I want to protect myself                                                                                                                                                                                                              | Total (N=1,204) | 839 (69.7)  | 365 (30.3) | n.s.       |        |
|                                                                                                                                                                                                                                       | Urban (N=525)   | 358 (68.3)  | 167 (31.7) |            |        |

|                                                                                     |               |            |             |       |
|-------------------------------------------------------------------------------------|---------------|------------|-------------|-------|
|                                                                                     | Rural (N=679) | 480 (70.7) | 199 (29.3)  |       |
| It is my responsibility as a citizen                                                | Total         | 923 (76.7) | 281 (23.3)  |       |
|                                                                                     | Urban         | 420 (80.1) | 105 (19.9)  |       |
|                                                                                     | Rural         | 503 (74.1) | 176 (25.9)  | 0.001 |
| Otherwise, I would receive a sanction                                               | Total         | 23 (1.9)   | 1181 (98.1) |       |
|                                                                                     | Urban         | 10 (1.8)   | 515 (98.2)  |       |
|                                                                                     | Rural         | 13 (1.9)   | 666 (98.1)  | n.s.  |
| My friends and family expect me to do so                                            | Total         | 120 (10.0) | 1084 (90.0) |       |
|                                                                                     | Urban         | 58 (11.0)  | 467 (89.0)  |       |
|                                                                                     | Rural         | 62 (9.2)   | 617 (90.8)  | n.s.  |
| <b>Would you vaccinate for COVID19?</b>                                             |               |            |             |       |
| <b>If not, why? <sup>2</sup></b>                                                    |               | yes        | empty       |       |
| Vaccination involves expenses (loss of income, transport, parking, holidays, etc.). | Total (N=222) | 8 (3.6)    | 214 (96.4)  |       |
|                                                                                     | Urban (N=77)  | 1 (1.3)    | 76 (98.7)   |       |
|                                                                                     | Rural (N=145) | 7 (4.6)    | 138 (95.4)  |       |
| I do not know where to do it                                                        | Total         | 4 (1.8)    | 218 (98.2)  |       |
|                                                                                     | Urban         | 4 (5.2)    | 73 (94.8)   |       |
|                                                                                     | Rural         | 0 (0)      | 145 (100)   |       |
| Others might accuse me of exposing others to unknown dangers                        | Total         | 5 (2.4)    | 217 (97.6)  |       |
|                                                                                     | Urban         | 0 (0.0)    | 77 (100.0)  |       |
|                                                                                     | Rural         | 5 (3.3)    | 140 (96.7)  |       |
| I don't trust the authorities with my data                                          | Total         | 28 (12.6)  | 194 (87.4)  |       |
|                                                                                     | Urban         | 9 (11.0)   | 68 (68.0)   |       |
|                                                                                     | Rural         | 19 (13.3)  | 126 (86.7)  |       |
| I do not believe in the existence of COVID-19                                       | Total         | 12 (5.4)   | 210 (94.6)  |       |
|                                                                                     | Urban         | 6 (7.8)    | 71 (92.2)   |       |
|                                                                                     | Rural         | 5 (3.7)    | 140 (96.3)  |       |
| I don't believe in the effectiveness of vaccination                                 | Total         | 113 (50.9) | 109 (49.1)  |       |
|                                                                                     | Urban         | 44 (56.8)  | 33 (43.2)   |       |
|                                                                                     | Rural         | 69 (47.8)  | 76 (52.2)   |       |
| I am afraid of being infected by vaccination or of side effects occurring           | Total         | 146 (65.7) | 76 (34.3)   |       |
|                                                                                     | Urban         | 49 (63.6)  | 28 (35.7)   |       |
|                                                                                     | Rural         | 96 (66.4)  | 49 (33.6)   |       |

|                                       |       |          |            |
|---------------------------------------|-------|----------|------------|
| I believe that vaccination is painful | Total | 14 (6.3) | 208 (93.7) |
|                                       | Urban | 3 (3.4)  | 74 (96.6)  |
|                                       | Rural | 11 (7.3) | 134 (92.7) |

<sup>1</sup> Urban versus rural, chi-square test.

<sup>2</sup> Reasons for vaccine non-hesitancy and hesitancy. One could answer the questions with yes or leave them blank. There was no "no", because multiple answers were possible.

Abbreviation: n.s., not significant.

**Table S4.** Attitudes towards COVID-19 disease, vaccine, and vaccination of survey participants by residence and vaccination hesitancy.

| Category                                          | Question                                                                                       | Vaccination        | Residence      |                |                | <i>p</i> -Value <sup>1</sup> |                          |
|---------------------------------------------------|------------------------------------------------------------------------------------------------|--------------------|----------------|----------------|----------------|------------------------------|--------------------------|
|                                                   |                                                                                                |                    | Total<br>N (%) | Urban<br>N (%) | Rural<br>N (%) | Residence <sup>2</sup>       | Hesitancy <sup>3,4</sup> |
| Decision making                                   | I think the decisions about COVID-19 made by the public authorities are right                  | COVID-19 (N=1,426) | 789 (57.8)     | 353 (60.4)     | 436 (55.9)     | n.s.                         | <0.001                   |
|                                                   |                                                                                                | General (N=178)    | 89 (52.7)      | 36 (60)        | 53 (48.6)      | n.s.                         | 0.006                    |
|                                                   | I think the decisions about vaccination against COVID-19 made by the authorities are right     | COVID-19           | 992 (75)       | 420 (75.5)     | 572 (74.6)     | n.s.                         | <0.001                   |
|                                                   |                                                                                                | General            | 118 (72.4)     | 46 (82.1)      | 72 (67.3)      | 0.044                        | <0.001                   |
|                                                   | I think the decisions about compulsory general vaccination by the public authorities are right | COVID-19           | 953 (73.2)     | 412 (74.9)     | 541 (71.9)     | n.s.                         | <0.001                   |
|                                                   |                                                                                                | General            | 110 (67.5)     | 42 (73.7)      | 68 (64.2)      | n.s.                         | <0.001                   |
| Trust in COVID-19 vaccination <sup>5</sup>        | I believe the vaccination can contain the virus                                                | COVID-19           | 1227 (86.1)    | 529 (88)       | 698 (84.7)     | n.s.                         | <0.001                   |
|                                                   |                                                                                                | General            | 147 (82.1)     | 53 (84.1)      | 94 (81)        | n.s.                         | <0.001                   |
|                                                   | If I knew that I had already been infected with the virus, I wouldn't get vaccinated           | COVID-19           | 492 (34.5)     | 186 (30.9)     | 306 (37.1)     | 0.014                        | <0.001                   |
|                                                   |                                                                                                | General            | 75 (42.1)      | 22 (35.5)      | 53 (45.7)      | n.s.                         | 0.004                    |
|                                                   | When all the others are vaccinated against the virus, I don't need to get vaccinated           | COVID-19           | 219 (15.4)     | 81 (13.5)      | 138 (16.7)     | n.s.                         | <0.001                   |
|                                                   |                                                                                                | General            | 25 (14.0)      | 4 (6.3)        | 21 (18.1)      | 0.03                         | 0.005                    |
|                                                   | If vaccination would be recommended for me, I would get vaccinated                             | COVID-19           | 1175 (82.5)    | 509 (84.6)     | 666 (80.9)     | n.s.                         | <0.001                   |
|                                                   |                                                                                                | General            | 136 (76.4)     | 50 (80.6)      | 86 (74.1)      | n.s.                         | <0.001                   |
|                                                   | If my doctor recommended a COVID-19 vaccination, I would get vaccinated                        | COVID-19           | 1152 (81.0)    | 497 (82.8)     | 655 (79.6)     | n.s.                         | <0.001                   |
|                                                   |                                                                                                | General            | 129 (72.1)     | 47 (74.6)      | 82 (70.7)      | n.s.                         | <0.001                   |
| COVID-19 vaccination is not necessary, because... | ...it is not effective                                                                         | COVID-19           | 198 (13.9)     | 78 (13.0)      | 120 (14.6)     | n.s.                         | <0.001                   |
|                                                   |                                                                                                | General            | 30 (16.9)      | 7 (11.3)       | 23 (19.8)      | n.s.                         | <0.001                   |
|                                                   | ...natural herd immunity is achieved with virus spread and that is quite sufficient            | COVID-19           | 274 (19.2)     | 110 (18.3)     | 164 (19.9)     | n.s.                         | <0.001                   |
|                                                   |                                                                                                | General            | 42 (23.6)      | 9 (14.5)       | 33 (28.4)      | 0.037                        | <0.001                   |
|                                                   | ...this disease does not exist/ is a normal flu                                                | COVID-19           | 149 (10.5)     | 48 (8.0)       | 101 (12.3)     | 0.009                        | <0.001                   |
|                                                   |                                                                                                | General            | 25 (14.0)      | 7 (11.1)       | 18 (15.5)      | n.s.                         | <0.001                   |
| COVID-19 vaccination is                           | ...the whole thing is only a profit for the pharmaceutical industry                            | COVID-19           | 320 (22.5)     | 117 (19.4)     | 203 (24.7)     | 0.019                        | <0.001                   |
|                                                   |                                                                                                | General            | 52 (29.2)      | 15 (24.2)      | 37 (31.9)      | n.s.                         | <0.001                   |
|                                                   | ...long-term risks are not known                                                               | COVID-19           | 665 (46.7)     | 275 (45.7)     | 390 (47.4)     | n.s.                         | <0.001                   |
|                                                   |                                                                                                | General            | 94 (52.8)      | 31 (50)        | 63 (54.3)      | n.s.                         | 0.001                    |

|                     |                                                                                                                         |          |            |            |            |       |        |
|---------------------|-------------------------------------------------------------------------------------------------------------------------|----------|------------|------------|------------|-------|--------|
| harmful, because... | ...new vaccines pose additional risks to the RNA                                                                        | COVID-19 | 306 (21.5) | 108 (18.0) | 198 (24.0) | 0.006 | <0.001 |
|                     |                                                                                                                         | General  | 48 (27.0)  | 10 (16.1)  | 38 (32.8)  | 0.017 | <0.001 |
|                     | ...some doctors advise against it                                                                                       | COVID-19 | 307 (21.5) | 126 (20.9) | 181 (22.0) | n.s.  | <0.001 |
|                     |                                                                                                                         | General  | 49 (27.4)  | 15 (24.2)  | 34 (29.1)  | n.s.  | <0.001 |
|                     | ...a compulsory corona vaccination with prioritization of certain groups will lead to major socio-political discussions | COVID-19 | 513 (36.0) | 218 (36.2) | 295 (35.8) | n.s.  | <0.001 |
|                     |                                                                                                                         | General  | 74 (41.6)  | 24 (38.7)  | 50 (43.1)  | n.s.  | 0.003  |

<sup>1</sup> *p*-values refer to the Chi-square test, in the urban areas a total of N=602 participants answered the questions (525 were non-hesitant and 77 were hesitant), in the rural areas a total of N=824 participants answered the questions (679 were non-hesitant and 145 were hesitant)

<sup>2</sup> Chi-square test null-hypothesis, the question is not answered differently by urban/rural residents.

<sup>3</sup> Vaccine hesitancy was measured with a dichotomous question: "Would you get vaccinated against COVID-19?"

<sup>4</sup> Chi-square test null-hypothesis, the question is not answered differently regarding vaccine hesitancy.

<sup>5</sup> (Rather) agreement, [4 - 6] on Likert scale.

Abbreviations: n.s., not significant

**Table S5.** Variables related to vaccination hesitancy and the effects of rural versus urban residency in South Tyrol, Italy.

| Category                                                                                                           | Question                                                                                                  | Vaccination           | Residence                                 |                            |                             | <i>p</i> -Value <sup>1</sup> |                          |
|--------------------------------------------------------------------------------------------------------------------|-----------------------------------------------------------------------------------------------------------|-----------------------|-------------------------------------------|----------------------------|-----------------------------|------------------------------|--------------------------|
|                                                                                                                    |                                                                                                           |                       | Total N<br>1426/178 <sup>2</sup><br>N (%) | Urban N<br>602/62<br>N (%) | Rural N<br>824/116<br>N (%) | Residence <sup>3</sup>       | Hesitancy <sup>4,5</sup> |
| Frequency of search for information on COVID-19? <sup>6</sup>                                                      | How often do you search for information on the new Coronavirus?                                           | COVID-19              | 628 (44.0) <sup>1</sup>                   | 320 (53.2) <sup>1</sup>    | 308 (37.4) <sup>1</sup>     | <0.001                       | <0.001                   |
|                                                                                                                    |                                                                                                           | General               | 56 (31.5)                                 | 27 (34.4)                  | 29 (24.7)                   | n.s.                         | n.s.                     |
| General national vaccination schedule                                                                              | Aside from COVID-19, I think everyone should be vaccinated according to the national vaccination schedule | COVID-19              | 1045 (73.3)                               | 470 (7.81)                 | 575 (69.8)                  | <0.001                       | <0.001                   |
|                                                                                                                    |                                                                                                           | General               | 130 (73.0)                                | 80 (69.0)                  | 50 (80.6)                   | n.s.                         | <0.001                   |
| Trust – How much do you trust information about COVID-19 and vaccinations from the following sources? <sup>7</sup> | TV                                                                                                        | COVID-19 <sup>2</sup> | 475 (33.3)                                | 204 (33.9)                 | 271 (32.9)                  | n.s.                         | <0.001                   |
|                                                                                                                    |                                                                                                           | General <sup>2</sup>  | 51 (28.3)                                 | 19 (30.2)                  | 32 (27.4)                   | n.s.                         | n.s.                     |
|                                                                                                                    | Newspapers/press                                                                                          | COVID-19              | 468 (32.8)                                | 204 (33.9)                 | 264 (32.0)                  | n.s.                         | <0.001                   |
|                                                                                                                    |                                                                                                           | General               | 55 (30.7)                                 | 24 (38.1)                  | 31 (26.7)                   | n.s.                         | n.s.                     |
|                                                                                                                    | Health care workers                                                                                       | COVID-19              | 1009 (70.8)                               | 438 (72.8)                 | 571 (69.3)                  | n.s.                         | <0.001                   |
|                                                                                                                    |                                                                                                           | General               | 129 (72.5)                                | 53 (85.5)                  | 76 (65.5)                   | 0.012                        | 0.025                    |
|                                                                                                                    | Social media                                                                                              | COVID-19              | 164 (11.5)                                | 79 (13.1)                  | 85 (10.3)                   | n.s.                         | 0.013                    |
|                                                                                                                    |                                                                                                           | General               | 17 (9.7)                                  | 11 (17.7)                  | 6 (5.3)                     | 0.022                        | n.s.                     |
|                                                                                                                    | Radio                                                                                                     | COVID-19              | 534 (37.5)                                | 224 (37.3)                 | 310 (37.6)                  | n.s.                         | <0.001                   |
|                                                                                                                    |                                                                                                           | General               | 69 (38.8)                                 | 29 (46.8)                  | 40 (34.5)                   | n.s.                         | 0.042                    |
|                                                                                                                    | Ministry of Health                                                                                        | COVID-19              | 836 (58.7)                                | 397 (65.9)                 | 439 (53.3)                  | <0.001                       | <0.001                   |
|                                                                                                                    |                                                                                                           | General               | 104 (58.8)                                | 43 (70.5)                  | 61 (52.6)                   | 0.036                        | 0.001                    |
|                                                                                                                    | National Institute of Health                                                                              | COVID-19              | 731 (51.3)                                | 378 (62.8)                 | 353 (42.8)                  | <0.001                       | <0.001                   |
|                                                                                                                    |                                                                                                           | General               | 95 (52.8)                                 | 44 (68.8)                  | 51 (44.0)                   | 0.005                        | 0.012                    |
|                                                                                                                    | Famous people/influencers                                                                                 | COVID-19              | 145 (10.2)                                | 54 (9.0)                   | 91 (11)                     | n.s.                         | <0.001                   |
|                                                                                                                    |                                                                                                           | General               | 17 (9.5)                                  | 5 (7.9)                    | 12 (10.3)                   | n.s.                         | n.s.                     |
|                                                                                                                    | WHO                                                                                                       | COVID-19              | 822 (57.7)                                | 368 (61.3)                 | 454 (55.1)                  | n.s.                         | <0.001                   |
|                                                                                                                    |                                                                                                           | General               | 98 (55.1)                                 | 42 (67.7)                  | 56 (48.3)                   | 0.043                        | <0.001                   |
|                                                                                                                    | Regional toll-free and emergency numbers                                                                  | COVID-19              | 616 (43.2)                                | 311 (51.7)                 | 305 (37.0)                  | <0.001                       | <0.001                   |
|                                                                                                                    |                                                                                                           | General               | 77 (43.0)                                 | 36 (57.1)                  | 41 (35.3)                   | 0.019                        | 0.004                    |

|                                  |                                                                                                                     |          |             |            |            |        |        |
|----------------------------------|---------------------------------------------------------------------------------------------------------------------|----------|-------------|------------|------------|--------|--------|
|                                  | Civil protection                                                                                                    | COVID-19 | 939 (65.9)  | 417 (69.4) | 522 (63.3) | 0.007  | <0.001 |
|                                  |                                                                                                                     | General  | 112 (63.3)  | 46 (74.2)) | 66 (57.4)  | n.s.   | 0.014  |
|                                  | Provincial government                                                                                               | COVID-19 | 741 (52.0)  | 339 (56.4) | 402 (48.8) | 0.012  | <0.001 |
|                                  |                                                                                                                     | General  | 89 (49.4)   | 40 (63.5)  | 49 (41.9)  | 0.016  | n.s.   |
|                                  | Management of the South Tyrolean Health Service                                                                     | COVID-19 | 550 (38.6)  | 185 (30.8) | 365 (44.3) | <0.001 | <0.001 |
|                                  |                                                                                                                     | General  | 70 (39.3)   | 16 (25.8)  | 54 (46.6)  | 0.005  | 0.001  |
| Conspiracy Thinking <sup>8</sup> | I think that many very important things happen in the world, which the public is never informed about               | COVID-19 | 952 (66.8)  | 383 (63.6) | 569 (69.1) | 0.030  | <0.001 |
|                                  |                                                                                                                     | General  | 124 (70.1)  | 42 (67.7)  | 82 (71.3)  | n.s.   | n.s.   |
|                                  | I think politicians usually do not tell us the true motives for their decisions                                     | COVID-19 | 803 (56.4)  | 340 (56.6) | 463 (56.2) | n.s.   | <0.001 |
|                                  |                                                                                                                     | General  | 100 (55.9)  | 35 (55.6)  | 65 (56.0)  | n.s.   | <0.001 |
|                                  | I think that government agencies closely monitor all citizens                                                       | COVID-19 | 407 (28.6)  | 167 (27.8) | 240 (29.1) | n.s.   | <0.001 |
|                                  |                                                                                                                     | General  | 61 (34.3)   | 20 (32.3)  | 41 (35.3)  | n.s.   | 0.019  |
|                                  | I think events that superficially seem to lack a connection superficially are often the result of secret activities | COVID-19 | 424 (29.8)  | 153 (25.5) | 271 (32.9) | 0.002  | <0.001 |
|                                  |                                                                                                                     | General  | 54 (30.3)   | 19 (30.6)  | 35 (30.2)  | n.s.   | 0.004  |
| Resilience                       | I think that there are secret organizations that greatly influence political decisions                              | COVID-19 | 509 (35.7)  | 203 (33.8) | 306 (37.1) | n.s.   | <0.001 |
|                                  |                                                                                                                     | General  | 64 (36.0)   | 21 (33.9)  | 43 (37.1)  | n.s.   | 0.031  |
|                                  | I have a hard time making it through stressful events                                                               | COVID-19 | 445 (31.2)  | 163 (27.1) | 282 (34.2) | 0.004  | n.s.   |
|                                  |                                                                                                                     | General  | 54 (30.3)   | 32.3 (62)  | 34 (29.3)  | n.s.   | n.s.   |
|                                  | It does not take me long to recover from a stressful event                                                          | COVID-19 | 751 (52.7)  | 306 (50.8) | 445 (54.0) | n.s.   | n.s.   |
|                                  |                                                                                                                     | General  | 97 (54.2)   | 30 (47.6)  | 67 (57.8)  | n.s.   | n.s.   |
|                                  | It is hard for me to snap back when something bad happens                                                           | COVID-19 | 497 (34.9)  | 198 (32.9) | 299 (36.3) | n.s.   | n.s.   |
|                                  |                                                                                                                     | General  | 64 (36.0)   | 21 (33.9)  | 43 (37.1)  | n.s.   | n.s.   |
| Altruism <sup>9</sup>            | I enjoy doing things for others                                                                                     | COVID-19 | 1145 (80.4) | 480 (79.9) | 824 (80.7) | n.s.   | n.s.   |
|                                  |                                                                                                                     | General  | 143 (80.3)  | 48 (77.4)  | 95 (81.9)  | n.s.   | n.s.   |
|                                  | I try to help others, even if they do not help me                                                                   | COVID-19 | 1085 (76.1) | 457 (75.9) | 628 (76.3) | n.s.   | 0.004  |
|                                  |                                                                                                                     | General  | 131 (73.6)  | 43 (69.4)  | 88 (75.9)  | n.s.   | n.s.   |
|                                  | Seeing others prosper makes me happy                                                                                | COVID-19 | 1221 (85.6) | 525 (87.2) | 696 (84.5) | n.s.   | n.s.   |
|                                  |                                                                                                                     | General  | 154 (86.5)  | 54 (87.1)  | 100 (86.2) | n.s.   | n.s.   |
|                                  | I care about the needs of other people                                                                              | COVID-19 | 1069 (75.0) | 455 (75.7) | 614 (74.5) | n.s.   | n.s.   |
|                                  |                                                                                                                     | General  | 140 (78.2)  | 50 (79.4)  | 90 (77.6)  | n.s.   | n.s.   |
|                                  |                                                                                                                     | COVID-19 | 222 (15.6)  | 79 (13.1)  | 143 (17.4) | 0.03   | n.s.   |
|                                  |                                                                                                                     |          |             |            |            |        |        |

|                                                             |                                                         |          |            |            |            |       |       |
|-------------------------------------------------------------|---------------------------------------------------------|----------|------------|------------|------------|-------|-------|
| I come first and should not have to care so much for others |                                                         | General  | 28 (15.7)  | 10 (16.1)  | 18 (15.5)  | n.s.  | n.s.  |
| <b>In the last two weeks I was...</b>                       |                                                         |          |            |            |            |       |       |
| Well-being                                                  | ...happy and in a good mood                             | COVID-19 | 490 (34.4) | 225 (37.4) | 265 (32.2) | 0.041 | 0.005 |
|                                                             |                                                         | General  | 59 (33.1)  | 23 (37.1)  | 36 (31.0)  | n.s.  | 0.017 |
|                                                             | ...calm and relaxed                                     | COVID-19 | 489 (34.3) | 235 (39.1) | 254 (30.8) | 0.001 | n.s.  |
|                                                             |                                                         | General  | 58 (32.6)  | 23 (37.1)  | 35 (30.2)  | n.s.  | n.s.  |
|                                                             | ...active and energetic                                 | COVID-19 | 589 (41.3) | 280 (46.5) | 309 (37.5) | 0.001 | n.s.  |
|                                                             |                                                         | General  | 73 (41.2)  | 31 (50)    | 73 (63.5)  | n.s.  | n.s.  |
|                                                             | ...I woke up fresh and rested                           | COVID-19 | 559 (39.2) | 267 (44.4) | 292 (35.4) | 0.001 | 0.001 |
|                                                             |                                                         | General  | 84 (47.2)  | 35 (56.5)  | 49 (42.2)  | n.s.  | n.s.  |
|                                                             | ...my everyday life was full of things that interest me | COVID-19 | 628 (44.1) | 287 (47.7) | 341 (41.4) | 0.019 | n.s.  |
|                                                             |                                                         | General  | 79 (44.4)  | 27 (43.5)  | 52 (44.8)  | n.s.  | n.s.  |

<sup>1</sup> *p*-values refer to the Chi-square test, in the urban areas a total of N=602 participants answered the questions (525 were non-hesitant and 77 were hesitant), in the rural areas a total of N=824 participants answered the questions (679 were non-hesitant and 145 were hesitant).

<sup>2</sup> N, number of all participants/number of participants with children <6 years of age.

<sup>3</sup> Chi-square test for null hypothesis 'The question is not answered differently by participants of urban/rural residency'.

<sup>4</sup> Vaccine hesitancy was measured with a dichotomous question: "Would you get vaccinated against COVID-19?"

<sup>5</sup> Chi-square test for null hypothesis 'The question is not answered differently by hesitant and non-hesitant'.

<sup>6</sup> More than once a week (Likert scale 1 – 3).

<sup>7</sup> 'Don't know' answers were available for items regarding trust in information sources.

<sup>8</sup> Conspiracy Mental Questionnaire [26].

<sup>9</sup> Altruistic Attitudes Among Older Adults Scale [28].

Abbreviations: n.s., not significant; n.a., not applicable.
